# Supplementary material for: Creating Consensus: Revisiting the Emergency Medicine Resident Scholarly Activity Requirement
Source: PubMed Central journal article supplement (PMC6404691; doi:10.5811/westjem.2018.10.39293), 2018-12-05
Supplement: wjem-20-369-s001.pdf [file wjem-20-369-s001.pdf]

Please help us by completing this brief survey by April 9, 2017. You are receiving it because you were identified as someone who may be interested in helping us build consensus on the 'scholarly project' requirement for EM residents. It has been 18 years since the SAEM Research Directors Interest group drafted a consensus on this topic and we are revisiting it in collaboration with the Evidence Based Healthcare and Implementation Interest Group. The responses you submit will be reported in an aggregate deidentified format at the SAEM 'Scholarly Project' Workshop which will be held during the combined interest group meetings at SAEM. While it will be helpful, it is not mandatory that you be at the SAEM meeting. If you are able, please join us in Orlando on :

**Thursday, May 18, 2017**

**7:00 AM - 8:50 AM**

**Bayhill 19: Lobby Level**

**Thank you in advance for your contribution.**

**Bryan Kane, MD**

**Chair, EBHI and**

**Marna Greenberg, DO, MPH**

**Chair, RDIG**

## 1. Purpose

On a scale of 1 to 4 (1 not very important to 4, very important) a primary role of the scholarly project is to:

|                                                                                                                 | 1                     | 2                     | 3                     | 4                     |
|-----------------------------------------------------------------------------------------------------------------|-----------------------|-----------------------|-----------------------|-----------------------|
| Instruct residents in the process of scientific inquiry                                                         | <input type="radio"/> | <input type="radio"/> | <input type="radio"/> | <input type="radio"/> |
| Teach the resident problem-solving skills                                                                       | <input type="radio"/> | <input type="radio"/> | <input type="radio"/> | <input type="radio"/> |
| Expose the resident to the mechanics of research                                                                | <input type="radio"/> | <input type="radio"/> | <input type="radio"/> | <input type="radio"/> |
| Learn the art of medical writing                                                                                | <input type="radio"/> | <input type="radio"/> | <input type="radio"/> | <input type="radio"/> |
| Expose the resident to research for consideration of an academic career                                         | <input type="radio"/> | <input type="radio"/> | <input type="radio"/> | <input type="radio"/> |
| Help focus the resident on an area of interest or expertise (EMS, toxicology, critical care, etc.)              | <input type="radio"/> | <input type="radio"/> | <input type="radio"/> | <input type="radio"/> |
| Teach the resident lifelong skills, including search strategies and critical appraisal                          | <input type="radio"/> | <input type="radio"/> | <input type="radio"/> | <input type="radio"/> |
| Teach the resident how to apply best practice principles to improve the delivery of health care in their system | <input type="radio"/> | <input type="radio"/> | <input type="radio"/> | <input type="radio"/> |
| Teach the resident how to formulate a question, search for the answer, and evaluate the strength of the answer  | <input type="radio"/> | <input type="radio"/> | <input type="radio"/> | <input type="radio"/> |

Other, please describe:

## 2. Definition.

On a scale of 1 to 4 (1 not very important, 4 very important), at completion of the scholarly project a resident should know how to:

|                                                      | 1                     | 2                     | 3                     | 4                     |
|------------------------------------------------------|-----------------------|-----------------------|-----------------------|-----------------------|
| Generate a hypothesis                                | <input type="radio"/> | <input type="radio"/> | <input type="radio"/> | <input type="radio"/> |
| Gather information and/or collect data               | <input type="radio"/> | <input type="radio"/> | <input type="radio"/> | <input type="radio"/> |
| Analyze data or show evidence of analytical thinking | <input type="radio"/> | <input type="radio"/> | <input type="radio"/> | <input type="radio"/> |
| State a conclusion or interpret results              | <input type="radio"/> | <input type="radio"/> | <input type="radio"/> | <input type="radio"/> |
| Contribute to what is known                          | <input type="radio"/> | <input type="radio"/> | <input type="radio"/> | <input type="radio"/> |
| Have the potential to change the health care system  | <input type="radio"/> | <input type="radio"/> | <input type="radio"/> | <input type="radio"/> |

Other, please describe:

## 3. Endpoints.

On a scale of 1 to 4 (1 not very important, 4 very important), the scholarly project should at minimum result in:

|                                                                                                                           | 1                     | 2                     | 3                     | 4                     |
|---------------------------------------------------------------------------------------------------------------------------|-----------------------|-----------------------|-----------------------|-----------------------|
| A research proposal submitted to the IRB                                                                                  | <input type="radio"/> | <input type="radio"/> | <input type="radio"/> | <input type="radio"/> |
| An abstract submission                                                                                                    | <input type="radio"/> | <input type="radio"/> | <input type="radio"/> | <input type="radio"/> |
| An oral presentation                                                                                                      | <input type="radio"/> | <input type="radio"/> | <input type="radio"/> | <input type="radio"/> |
| A paper of publishable quality that includes all of these elements: hypothesis, data collection, analysis, interpretation | <input type="radio"/> | <input type="radio"/> | <input type="radio"/> | <input type="radio"/> |
| A paper submitted to a peer-reviewed journal                                                                              | <input type="radio"/> | <input type="radio"/> | <input type="radio"/> | <input type="radio"/> |
| Written documentation of the project archived by the residency                                                            | <input type="radio"/> | <input type="radio"/> | <input type="radio"/> | <input type="radio"/> |

Other, please describe:

#### 4. Endpoints (cont.)

On a scale of 1 to 4 (1 completely disagree, 4 completely agree):

|                                                                                                                             | 1                     | 2                     | 3                     | 4                     |
|-----------------------------------------------------------------------------------------------------------------------------|-----------------------|-----------------------|-----------------------|-----------------------|
| A case report can meet the definition of the scholarly project.                                                             | <input type="radio"/> | <input type="radio"/> | <input type="radio"/> | <input type="radio"/> |
| A public health project can meet the definition of the scholarly project.                                                   | <input type="radio"/> | <input type="radio"/> | <input type="radio"/> | <input type="radio"/> |
| A quality improvement exercise can meet the definition of the scholarly project.                                            | <input type="radio"/> | <input type="radio"/> | <input type="radio"/> | <input type="radio"/> |
| A curriculum development can meet the definition of the scholarly project.                                                  | <input type="radio"/> | <input type="radio"/> | <input type="radio"/> | <input type="radio"/> |
| A lecture can meet the definition of the scholarly project.                                                                 | <input type="radio"/> | <input type="radio"/> | <input type="radio"/> | <input type="radio"/> |
| A systematic review can meet the definition of the scholarly project.                                                       | <input type="radio"/> | <input type="radio"/> | <input type="radio"/> | <input type="radio"/> |
| A published original research paper can meet the definition of the scholarly project.                                       | <input type="radio"/> | <input type="radio"/> | <input type="radio"/> | <input type="radio"/> |
| A published original research paper completed prior to starting residency can meet the definition of the scholarly project. | <input type="radio"/> | <input type="radio"/> | <input type="radio"/> | <input type="radio"/> |
| Developing an evidence based practice guideline can meet the definition of the scholarly project.                           | <input type="radio"/> | <input type="radio"/> | <input type="radio"/> | <input type="radio"/> |
| A book chapter can meet the definition of the scholarly project.                                                            | <input type="radio"/> | <input type="radio"/> | <input type="radio"/> | <input type="radio"/> |
| A contribution to an online EM blog or podcast can meet the definition of the scholarly project .                           | <input type="radio"/> | <input type="radio"/> | <input type="radio"/> | <input type="radio"/> |

Other, please describe:

5. Other.

Regarding implementation of the scholarly project, on a scale of 1 to 4 (1 completely disagree, 4 completely agree), the scholarly project should be:

|                                       | 1                     | 2                     | 3                     | 4                     |
|---------------------------------------|-----------------------|-----------------------|-----------------------|-----------------------|
| Completed during one 'research' month | <input type="radio"/> | <input type="radio"/> | <input type="radio"/> | <input type="radio"/> |
| Spread out over 3 or more years       | <input type="radio"/> | <input type="radio"/> | <input type="radio"/> | <input type="radio"/> |
| The beginning of a career focus       | <input type="radio"/> | <input type="radio"/> | <input type="radio"/> | <input type="radio"/> |

Other, please describe:

6. On a scale of 1 to 4 (1 completely disagree, 4 completely agree) the research director should:

|                                                                        | 1                     | 2                     | 3                     | 4                     |
|------------------------------------------------------------------------|-----------------------|-----------------------|-----------------------|-----------------------|
| Help set the guidelines for the scholarly activity                     | <input type="radio"/> | <input type="radio"/> | <input type="radio"/> | <input type="radio"/> |
| Using FINER criteria, provide quality assurance in project development | <input type="radio"/> | <input type="radio"/> | <input type="radio"/> | <input type="radio"/> |
| Check timeline for project completion                                  | <input type="radio"/> | <input type="radio"/> | <input type="radio"/> | <input type="radio"/> |
| Help create a departmental environment for research                    | <input type="radio"/> | <input type="radio"/> | <input type="radio"/> | <input type="radio"/> |
| Help provide tools and resources for research                          | <input type="radio"/> | <input type="radio"/> | <input type="radio"/> | <input type="radio"/> |
| Act as a motivator for scholarly activity among residents              | <input type="radio"/> | <input type="radio"/> | <input type="radio"/> | <input type="radio"/> |
| Instruct the resident in critical appraisal skills                     | <input type="radio"/> | <input type="radio"/> | <input type="radio"/> | <input type="radio"/> |
| Instruct the resident in research skills                               | <input type="radio"/> | <input type="radio"/> | <input type="radio"/> | <input type="radio"/> |

Other, please describe:

7. On a scale of 1 to 4 (1 completely disagree, 4 completely agree) the person responsible for the resident scholarly project should be:

|                                                           | 1                     | 2                     | 3                     | 4                     |
|-----------------------------------------------------------|-----------------------|-----------------------|-----------------------|-----------------------|
| The resident.                                             | <input type="radio"/> | <input type="radio"/> | <input type="radio"/> | <input type="radio"/> |
| The program director.                                     | <input type="radio"/> | <input type="radio"/> | <input type="radio"/> | <input type="radio"/> |
| The research director.                                    | <input type="radio"/> | <input type="radio"/> | <input type="radio"/> | <input type="radio"/> |
| The resident, program director and the research director. | <input type="radio"/> | <input type="radio"/> | <input type="radio"/> | <input type="radio"/> |

Other, please describe:

## Demographics

8. What is your age?

- 18-24
- 25-30
- 31-40
- 41-50
- >51

9. What is your sex?

- Male
- Female
- Other (please specify)

10. Category that best represents your position (mark all that apply):

- Faculty of EM Residency Program
- Program Director (or Assistant PD)
- Research Director (Or assistant)
- Fellowship Director (or Assistant)
- Resident/Fellow
- Department Chair (or Vice)
- ACGME/RRC member
- EM physician
- Program coordinator
- Other (please specify)

11. What type structure is your program?

- PG 1-3
- PG 1-4
- Other (please specify)

12. Organization that you belong to/represent (mark all that apply):

- SAEM Research Director's Interest Group
- SAEM Evidence Based Healthcare Implementation Interest Group
- SAEM Research Committee
- ACEP Research Committee
- ACOEP
- EMRA
- AACEM
- ACGME/RRC
- Other (please specify)

*Thank you for your time!*

13. Please provide any additional comments or suggestions:

14. OPTIONAL: The responses you have given will be reported in an aggregate deidentified format. If you want your name and information to be listed generically as a participant in the consensus building process please include it here:

|                              |                      |
|------------------------------|----------------------|
| Name: first, last, degree(s) | <input type="text"/> |
| Institutional Affiliation    | <input type="text"/> |
| Rank and/or Title            | <input type="text"/> |
| email address:               | <input type="text"/> |
